# Supplementary material for: Patient and Patient Group Engagement in Cancer Clinical Trials: A Stakeholder Charter
Source: MDPI journal article supplement (doi:10.3390/curroncol28020137), 2021-04-08
Supplement: s1 [file s1]

# Supplementary Materials

## Patient and Patient Group Engagement in Cancer Clinical Trials: A Stakeholder Charter

Stéphanie Michaud <sup>1</sup>, Judy Needham <sup>2</sup>, Stephen Sundquist <sup>3</sup>, Dominique Johnson <sup>4</sup>, Sabrina Hanna <sup>5</sup>, Sharareh Hosseinzadeh <sup>6</sup>, Vatche Bartekian <sup>7</sup>, Patricia Steele <sup>8</sup>, Sarita Benchimol <sup>8</sup>, Nathalie Ross <sup>9</sup> and Barry D. Stein <sup>8,\*</sup>

**Table S1.** Members of the Charter working group throughout the Charter development process.

| Name                  | Affiliation                                                |
|-----------------------|------------------------------------------------------------|
| Karen Arts*           | N2                                                         |
| Vatche Bartekian      | Vantage BioTrials                                          |
| Emanuela De Franco*   | Novartis                                                   |
| Sabrina Hanna         | The cancer collaborative                                   |
| Sharareh Hosseinzadeh | Novartis Pharma Canada                                     |
| Isabelle Jodoin*      | Novartis Pharma Canada                                     |
| Dominique Johnson     | McPeak-Sirois Group for Clinical Research in Breast Cancer |
| Stéphanie Michaud     | BioCanRx                                                   |
| Judy Needham          | Canadian Cancer Trials Group                               |
| Dawn Richards*        | Clinical Trials Ontario                                    |
| Stephen Sundquist     | Canadian Cancer Clinical Trials Network                    |
| Patricia Steele       | Colorectal Cancer Canada                                   |
| Sarita Benchimol      | Colorectal Cancer Canada                                   |
| Barry Stein           | Colorectal Cancer Canada                                   |

The meetings were facilitated by Anne Marie Weight (Elements Strategy) with the assistance of Elle Doherty (CCC). \*Previous members.

**Table S2.** Stakeholders attending the 2019 CCC PG Pathway Model to Accessing Cancer Clinical Trials & Real-World Evidence Methodologies Conference.

| Name                             | Affiliation                                                |
|----------------------------------|------------------------------------------------------------|
| <b>Patient groups</b>            |                                                            |
| Niya Chari                       | Canadian Breast Cancer Network                             |
| Martine Elias                    | Myeloma Canada                                             |
| Terry Hawrysh*                   | Patient partner from the GO-CART program                   |
| Cathie Jackson                   | Colorectal Cancer Canada                                   |
| Dominique Johnson                | McPeak-Sirois Group for Clinical Research in Breast Cancer |
| Nathalie Laplante                | McPeak-Sirois Group for Clinical Research in Breast Cancer |
| May Karry                        | Colorectal Cancer Canada                                   |
| Morgan Kennedy                   | Colorectal Cancer Canada                                   |
| Katya Kruglova                   | Colorectal Cancer Canada                                   |
| Jackie Manthorne                 | Canadian Cancer Survivor Network                           |
| Carole McMahon*                  | Former pCODR patient member                                |
| Anne-Marie Myers                 | Colorectal Cancer Canada                                   |
| Judy Needham                     | Canadian Cancer Trials Group                               |
| Frank Pitman                     | Colorectal Cancer Canada                                   |
| Zal Press                        | Patient Commando                                           |
| Bunnie Schwartz                  | Colorectal Cancer Canada                                   |
| Patricia Steele                  | Colorectal Cancer Canada                                   |
| Barry Stein                      | Colorectal Cancer Canada*                                  |
| Eva Villalba                     | Coalition Priorité Cancer                                  |
| Chelsey Weir                     | Colorectal Cancer Canada                                   |
| <b>Clinical research centres</b> |                                                            |
| Winson Cheung*                   | Tom Baker Cancer Centre                                    |
| Manoj Lalu*                      | Ottawa Hospital Research Institute                         |
| Ingrid Saba                      | Brooks Life Sciences                                       |
| Stephen Sundquist                | 3CTN                                                       |
| Sara Urowitz                     | Canadian Cancer Research Alliance                          |

|                                         |                                     |
|-----------------------------------------|-------------------------------------|
| Philip Wong                             | CHUM                                |
| <b>Healthcare and research agencies</b> |                                     |
| Sylvie Bouchard*                        | INESSS                              |
| Penny Chipman*                          | McGill University Health Center     |
| Maxime Dumais                           | Oncopole                            |
| Melissa Hunt*                           | Health Canada                       |
| Stéphanie Michaud*                      | BioCanRx                            |
| Dawn Richards*                          | Clinical Trials Ontario             |
| <b>Industry</b>                         |                                     |
| Negin Ashki                             | Eli Lilly Canada                    |
| Jennifer Atkinson*                      | Roche Canada                        |
| Vatche Bartekian                        | Vantage BioTrials                   |
| Maude Beaulieu                          | Amgen                               |
| Nathalie Brazeau                        | Janssen                             |
| Grace Castillo-Soyao                    | Self Care Catalysts                 |
| Alexandra Chambers*                     | Novartis Oncology                   |
| Monique Deol*                           | Roche Canada                        |
| Jianmin Duan                            | Duan Pharmaceutical Consulting Inc. |
| Michael Duong*                          | Hoffmann-La Roche                   |
| Felicia Flowitt                         | AstraZeneca                         |
| Leigh Funston                           | AstraZeneca                         |
| Aman Garg                               | FLS transportation                  |
| Valerie Higenell*                       | Exactis                             |
| Chantal Lacasse                         | AbbVie                              |
| Daniel Lacroix                          | IQVIA                               |
| Stephanie Lacroix                       | Merck Canada Inc.                   |
| Frédéric Lavoie*                        | Pfizer                              |
| Johanna Mancini*                        | IQVIA                               |
| Suzan McNamara                          | Exactis Innovation                  |
| Charles Milliard                        | National Cabinet                    |
| Christine Montgrain                     | AbbVie                              |
| Wendy Morton                            | Merck Canada                        |
| Albert Nguyen                           | IQVIA                               |
| Josée Pelletier                         | BMS                                 |
| Francois Peloquin                       | Pfizer Canada ULC                   |
| Sabrina Perri                           | Novartis Canada                     |
| Marie Prévost                           | AbbVie                              |
| Vincent Raymond                         | Pfizer Canada                       |
| Philippe Renaud                         | Bayer                               |
| Ugendhar Surkanti                       | Onco Pharma                         |
| Helen Trifonopoulos*                    | Novartis Oncology                   |
| Brigitte Viel                           | Pfizer Canada                       |
| Diane Wright*                           | Roche Canada                        |
| <b>Key experts</b>                      |                                     |
| Nathalie Ross                           | Nathalie Ross, Ph.D., MWC           |
| Anne Marie Wright*                      | Elements Strategy Inc.              |

\*Meeting presenter, moderator, and/or facilitator.

**Table S3.** The Canadian Cancer Clinical Trials Stakeholder Charter’s Glossary.

| Term/Expression                               | Definition                                                                                                                                                                                                                                                                                                                                                                                                                                                                                                                                                                                                                                                                                                                               |
|-----------------------------------------------|------------------------------------------------------------------------------------------------------------------------------------------------------------------------------------------------------------------------------------------------------------------------------------------------------------------------------------------------------------------------------------------------------------------------------------------------------------------------------------------------------------------------------------------------------------------------------------------------------------------------------------------------------------------------------------------------------------------------------------------|
| <b>Adopters of the Charter:</b>               | A person or an organization/institution that chooses to take up, follow or use the Charter for its intended purpose.                                                                                                                                                                                                                                                                                                                                                                                                                                                                                                                                                                                                                     |
| <b>Clinical Trial:</b>                        | Any oncology investigation in human subjects intended to determine the clinical pharmacological, pharmacokinetics, and/or other pharmacodynamics effect of an investigational agent, and/or to identify any adverse reactions to an investigational agent to assess the agent’s safety and efficacy.                                                                                                                                                                                                                                                                                                                                                                                                                                     |
| <b>Clinical Trial Continuum:</b>              | The sequential series of steps involved in the development of clinical trials. These include 1- the Discovery and preclinical stages, the Phase 1-3 trials, the Regulatory review process and the post-approval process.                                                                                                                                                                                                                                                                                                                                                                                                                                                                                                                 |
| <b>Clinical Trial Lifecycle:</b>              | The sequential series of steps involved in the development of clinical trials. These include the discovery and pre-clinical stages, as well as Phase 0 trials to learn how an agent is processed in the human body and how it may affect the body, Phase I trials seek to find the best dose of a new agent and assess overall safety, Phase II trials aim to further assess the safety as well as determine if the agent works, Phase III trials further investigate product safety, effectiveness of a new agent as compared to the standard of care in larger study populations, Phase IV trials, otherwise known as post-marketing trials, serve to test agents previously approved for use by Health Canada (agents include drugs). |
| <b>Consent Process:</b>                       | A process in which a healthcare provider educates a Patient about the risks, benefits and alternatives of a given procedure, intervention or treatment. The Patient must be competent to make a voluntary decision about whether to undergo the said procedure or treatment.                                                                                                                                                                                                                                                                                                                                                                                                                                                             |
| <b>Patient (Cancer Patient):</b>              | A person who is receiving medical treatment for a malignant growth or tumour.                                                                                                                                                                                                                                                                                                                                                                                                                                                                                                                                                                                                                                                            |
| <b>Patient Centricity:</b>                    | The process of designing a service or solution around the Patient. In Clinical Trials it is a trial designed with the Patient at the forefront to improve the overall experience for the Patient by including their concerns and priorities in the design ensuring that the Clinical Trial answers specific unmet needs of the Patient.                                                                                                                                                                                                                                                                                                                                                                                                  |
| <b>Patient-Facing Materials:</b>              | Documentation associated with each phase of a clinical trial that is written in a language that is tailored to the audience and their cultural area. Titles of studies, terminology and wordings are translated in a patient-friendly manner to ensure maximum transparency and comprehension.                                                                                                                                                                                                                                                                                                                                                                                                                                           |
| <b>Patient Group:</b>                         | A term encompassing patient advocacy organizations, disease advocacy organizations, voluntary health services, non-profit research foundations and public health organizations for clarity of focus. Our use of the term Patient Group in not meant to refer to individual Patients or individual advocates.                                                                                                                                                                                                                                                                                                                                                                                                                             |
| <b>Patient Preferences/ Perspectives:</b>     | Patient Preferences/Perspectives related to therapies and outcomes regarding willingness to accept uncertainty and trade-offs based on potential harm versus benefits. Benefits-risk assessment may also seek to identify subgroups of Patients in a heterogeneous population based on preferences.                                                                                                                                                                                                                                                                                                                                                                                                                                      |
| <b>Protocol (Clinical Trial Protocol):</b>    | Every clinical investigation begins with the development of a clinical trial protocol. The protocol is a document that describes how a clinical trial will be conducted (the objective(s), design, methodology, statistical considerations and organization of a clinical trial), and ensures the safety of the trial subjects (participants) and integrity of the data collected (source: <a href="#">Clinical Research Resource Hub</a> ).                                                                                                                                                                                                                                                                                             |
| <b>Real-World Data (RWD):</b>                 | Real world data are the data relating to patient health status and/or the delivery of health care routinely collected from a variety of sources, such as electronic health records and product and disease registries (source: <a href="#">Food and Drug Association</a> (FDA)).                                                                                                                                                                                                                                                                                                                                                                                                                                                         |
| <b>Real-World Evidence (RWE):</b>             | Clinical evidence regarding the usage and potential benefits or risks of a medical product derived from analysis of RWD.                                                                                                                                                                                                                                                                                                                                                                                                                                                                                                                                                                                                                 |
| <b>Researchers:</b>                           | Individuals engaged in the conduct of scientific research at an academic or pharmaceutical institution.                                                                                                                                                                                                                                                                                                                                                                                                                                                                                                                                                                                                                                  |
| <b>Stakeholders:</b>                          | Parties with concerns or interests in an organization, endeavor, or initiative. Stakeholders include but are not limited to: <ul style="list-style-type: none"> <li>• Governmental institutions and agencies <ul style="list-style-type: none"> <li>• Medical Researchers</li> <li>• Patients/Patient Groups</li> </ul> </li> <li>• Pharmaceutical/Biotech Companies</li> <li>Regulatory bodies (internal/external)</li> </ul>                                                                                                                                                                                                                                                                                                           |
| <b>Standard of Care Treatment:</b>            | Treatment that is accepted by medical experts as an appropriate treatment for a certain type of disease and that is widely used by healthcare professionals. Also called best practice, standard medical care, and standard therapy (source: <a href="#">National Cancer Institute (NCI)</a> ).                                                                                                                                                                                                                                                                                                                                                                                                                                          |
| <b>Standard of Work Practice:</b>             | The regulations, guidance and industry standards that make up Standard of Work Practice of good clinical practice are intended to provide assurance that the rights, safety and well-being of Clinical Trial subjects are protected.                                                                                                                                                                                                                                                                                                                                                                                                                                                                                                     |
| <b>Study Design:</b>                          | Study design is a particular framework, or the set of methods and procedures used to collect and analyze data on variables specified in a particular research problem (source: <a href="#">National Institutes of Health (NIH)</a> ).                                                                                                                                                                                                                                                                                                                                                                                                                                                                                                    |
| <b>Therapeutic Intervention (Oncology): A</b> | clinical effort to improve the well-being of someone who has cancer. Therapeutic interventions in oncology include chemotherapy, immunotherapy, and surgery.                                                                                                                                                                                                                                                                                                                                                                                                                                                                                                                                                                             |
| <b>Trial Information Data:</b>                | The computerized form of results and analysis obtained throughout the Clinical Trial process, including Patient treatment responses and other derived variable.                                                                                                                                                                                                                                                                                                                                                                                                                                                                                                                                                                          |
